# Supplementary material for: On the reversibility of parasitism: adaptation to a free-living lifestyle via gene acquisitions in the diplomonad Trepomonas sp. PC1
Source: PubMed Central journal article supplement (PMC4967989; doi:10.1186/s12915-016-0284-z), 2016-08-01
Supplement: 12915_2016_284_MOESM1_ESM.pdf [file 12915_2016_284_MOESM1_ESM.pdf]

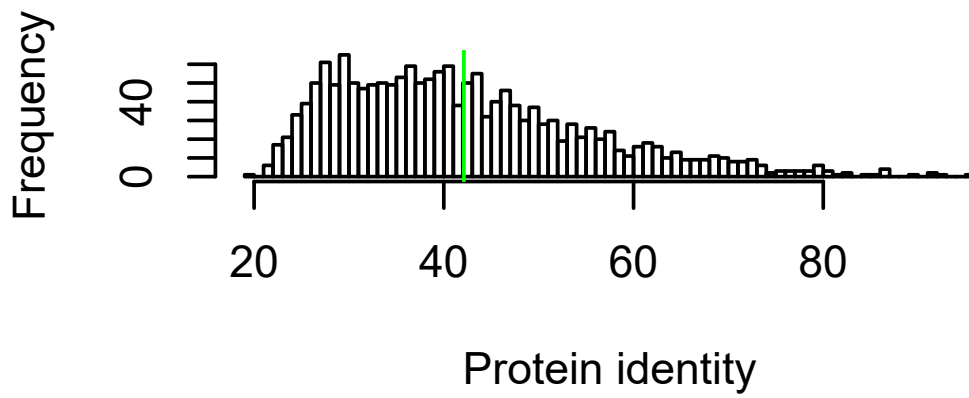

**Figure S1. Histogram of the protein identities.** Based on 1692 1:1 orthologous pairs between *Trepomonas* sp. PC1 and *S. salmonicida*. Green line indicates the mean protein identity.
