# Supplementary material for: On the reversibility of parasitism: adaptation to a free-living lifestyle via gene acquisitions in the diplomonad Trepomonas sp. PC1
Source: PubMed Central journal article supplement (PMC4967989; doi:10.1186/s12915-016-0284-z), 2016-08-01
Supplement: 12915_2016_284_MOESM3_ESM.pdf [file 12915_2016_284_MOESM3_ESM.pdf]

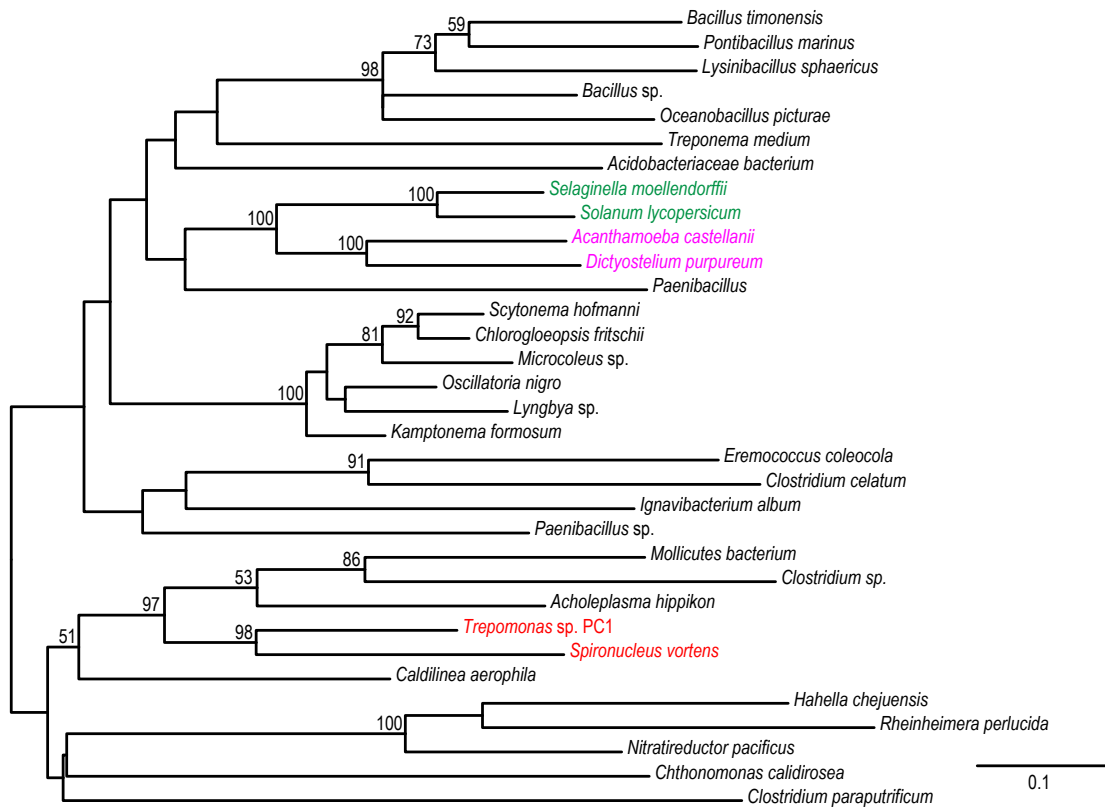

**Figure S3. Protein maximum likelihood phylogeny of N-acetyl-D-glucosamine (GlcNAc) kinase.** Eukaryotes are labeled according to their classification [2]: Amoebozoa (purple), Archaeplastida (green) and Excavata (red). Only bootstrap support values >50 are shown.
