# Supplementary material for: On the reversibility of parasitism: adaptation to a free-living lifestyle via gene acquisitions in the diplomonad Trepomonas sp. PC1
Source: PubMed Central journal article supplement (PMC4967989; doi:10.1186/s12915-016-0284-z), 2016-08-01
Supplement: 12915_2016_284_MOESM5_ESM.pdf [file 12915_2016_284_MOESM5_ESM.pdf]

**Table S1. *Trepomonas* proteins identified as putative lateral gene transfers.**

| Transcript | annotation                                                               | event# <sup>a</sup> | tree# <sup>b</sup> | #stops <sup>c</sup> | abundance <sup>d</sup> | Giardia <sup>e</sup> | Spiro <sup>f</sup> | other euks <sup>g</sup>                   | donor <sup>h</sup> | bootstrap <sup>h</sup> |
|------------|--------------------------------------------------------------------------|---------------------|--------------------|---------------------|------------------------|----------------------|--------------------|-------------------------------------------|--------------------|------------------------|
| TPC1_12469 | [FeFe]-hydrogenase                                                       | 217                 | 163                | 6                   | 2257                   | +                    | +                  | <i>Entamoeba</i> ,<br><i>Retortamonas</i> | B                  |                        |
| TPC1_13661 | [FeFe]-hydrogenase                                                       | 217                 | 163                | 8                   | 248                    | +                    | +                  | <i>Entamoeba</i> ,<br><i>Retortamonas</i> | B                  |                        |
| TPC1_14764 | [FeFe]-hydrogenase                                                       | 217                 | 163                | 6                   | 10                     | +                    | +                  | <i>Entamoeba</i> ,<br><i>Retortamonas</i> | B                  |                        |
| TPC1_14871 | 2,3-bisphosphoglycerate-independent phosphoglycerate mutase              | 90                  | 165                | 15                  | 8                      | -                    | +                  |                                           | A                  |                        |
| TPC1_14500 | 2'-5' RNA ligase                                                         | 214                 | 153                | 5                   | 4                      | -                    | -                  |                                           | B                  |                        |
| TPC1_15481 | 2'-5' RNA ligase                                                         | 95                  | 184                | 6                   | 3                      | -                    | -                  |                                           | B                  |                        |
| TPC1_10119 | 4Fe-4S ferredoxin                                                        | 144                 | 5                  | 1                   | 209                    | -                    | -                  | <i>Entamoeba</i>                          | B                  |                        |
| TPC1_10418 | 4Fe-4S ferredoxin iron-sulfur binding domain protein                     | 8                   | 15                 | 9                   | 87                     | -                    | +                  |                                           | B                  |                        |
| TPC1_11134 | 4Fe-4S ferredoxin iron-sulfur binding domain protein                     | 8                   | 15                 | 4                   | 49                     | -                    | +                  |                                           | B                  |                        |
| TPC1_11650 | 4Fe-4S ferredoxin iron-sulfur binding domain protein                     | 8                   | 15                 | 10                  | 8                      | -                    | +                  |                                           | B                  |                        |
| TPC1_17692 | 4Fe-4S ferredoxin iron-sulfur binding domain protein                     | 8                   | 15                 | 5                   | 57                     | -                    | +                  |                                           | B                  |                        |
| TPC1_15879 | 4Fe-4S ferredoxin iron-sulfur binding domain-containing protein          | 104                 | 203                | 2                   | 92                     | -                    | -                  |                                           | B                  |                        |
| TPC1_12176 | 5'-methylthioadenosine nucleosidase, S-adenosylhomocysteine nucleosidase | 41                  | 75                 | 5                   | 27                     | +                    | +                  |                                           | B                  |                        |
| TPC1_10637 | 5'-nucleotidase SurE                                                     | 36                  | 69                 | 2                   | 8                      | -                    | J                  |                                           | B                  |                        |
| TPC1_12058 | 5'-nucleotidase SurE                                                     | 36                  | 69                 | 4                   | 124                    | -                    | J                  |                                           | B                  |                        |
| TPC1_11689 | Acetyltransferase                                                        | 32                  | 56                 | 10                  | 4                      | -                    | -                  |                                           | B-Actinobacteria   | 95                     |
| TPC1_12740 | Acetyl-transferase                                                       | 50                  | 99                 | 12                  | 5                      | -                    | -                  |                                           | B-Haloplasmatales  | 92                     |
| TPC1_11869 | Acetyltransferase (GNAT) family protein                                  | 170                 | 61                 | 8                   | 12                     | -                    | -                  |                                           | B                  |                        |
| TPC1_16988 | Acyl-CoA synthetase                                                      | 260                 | 245                | 13                  | 260                    | +                    | +                  | <i>Trichomonas</i>                        | B                  |                        |
| TPC1_17761 | Acyl-CoA synthetase                                                      | 260                 | 245                | 11                  | 804                    | +                    | +                  | <i>Trichomonas</i>                        | B                  |                        |
| TPC1_10594 | Acyl-CoA--carboxylate coenzyme A transferase, family III                 | 10                  | 17                 | 10                  | 85                     | -                    | -                  |                                           | B                  |                        |
| TPC1_10685 | Adenine phosphoribosyltransferase                                        | 14                  | 23                 | 4                   | 19                     | +                    | +                  |                                           | B                  |                        |

| Transcript | annotation                           | event# <sup>a</sup> | tree# <sup>b</sup> | #stops <sup>c</sup> | abundance <sup>d</sup> | Giardia <sup>e</sup> | Spiro <sup>f</sup> | other euks <sup>g</sup>       | donor <sup>h</sup> | bootstrap <sup>h</sup> |
|------------|--------------------------------------|---------------------|--------------------|---------------------|------------------------|----------------------|--------------------|-------------------------------|--------------------|------------------------|
| TPC1_14740 | Adenosine deaminase                  | 216                 | 162                | 3                   | 9                      | -                    | -                  |                               | B                  |                        |
| TPC1_15380 | Adenosine deaminase                  | 216                 | 162                | 7                   | 76                     | -                    | -                  |                               | B                  |                        |
| TPC1_11403 | ADP-ribosylglycohydrolase            | 193                 | 100                | 8                   | 9                      | -                    | -                  | <i>Naegleria, Salpingoeca</i> | B                  |                        |
| TPC1_12772 | ADP-ribosylglycohydrolase            | 193                 | 100                | 11                  | 13                     | -                    | -                  | <i>Naegleria, Salpingoeca</i> | B                  |                        |
| TPC1_12927 | ADP-ribosylglycohydrolase            | 193                 | 100                | 15                  | 6                      | -                    | -                  | <i>Naegleria, Salpingoeca</i> | B                  |                        |
| TPC1_15113 | ADP-ribosylglycohydrolase            | 193                 | 100                | 5                   | 74                     | -                    | -                  | <i>Naegleria, Salpingoeca</i> | B                  |                        |
| TPC1_15154 | ADP-ribosylglycohydrolase            | 223                 | 174                | 10                  | 30                     | -                    | +                  |                               | B                  |                        |
| TPC1_16786 | ADP-ribosylglycohydrolase            | 223                 | 174                | 8                   | 158                    | -                    | +                  |                               | B                  |                        |
| TPC1_17522 | ADP-specific phosphofructokinase     | 139                 | 259                | 8                   | 81                     | -                    | +                  |                               | A                  |                        |
| TPC1_11493 | Alcohol dehydrogenase                | 29                  | 52                 | 6                   | 29                     | -                    | +                  |                               | B                  |                        |
| TPC1_10709 | Alcohol dehydrogenase                | 35                  | 66                 | 4                   | 2691                   | -                    | +                  |                               | B                  |                        |
| TPC1_11970 | Alcohol dehydrogenase                | 35                  | 66                 | 12                  | 3                      | -                    | +                  |                               | B                  |                        |
| TPC1_14538 | Alcohol dehydrogenase                | 85                  | 156                | 5                   | 2858                   | -                    | +                  |                               | B                  |                        |
| TPC1_15530 | Alcohol dehydrogenase                | 96                  | 187                | 5                   | 75                     | -                    | +                  |                               | B                  |                        |
| TPC1_16602 | Alcohol dehydrogenase                | 119                 | 230                | 15                  | 15                     | + <sup>k</sup>       | + <sup>l</sup>     |                               | B                  |                        |
| TPC1_16865 | Alcohol dehydrogenase                | 126                 | 240                | 0                   | 5911                   | +                    | +                  |                               | B                  |                        |
| TPC1_11677 | Alcohol dehydrogenase E              | 167                 | 55                 | 2                   | 15708                  | +                    | +                  |                               | B                  |                        |
| TPC1_16833 | Alcohol dehydrogenase E              | 257                 | 238                | 2                   | 1752                   | +                    | +                  |                               | B                  |                        |
| TPC1_11144 | Aldehyde dehydrogenase               | 21                  | 41                 | 27                  | 57                     | -                    | +                  |                               | B-Fusobacteria     | 82                     |
| TPC1_17087 | Aldehyde dehydrogenase               | 21                  | 41                 | 4                   | 45                     | -                    | +                  |                               | B-Fusobacteria     | 82                     |
| TPC1_12708 | Alpha amylase                        | 192                 | 98                 | 9                   | 8                      | -                    | -                  |                               | B                  |                        |
| TPC1_12954 | Alpha amylase                        | 57                  | 109                | 12                  | 41                     | -                    | -                  |                               | B                  |                        |
| TPC1_17202 | Alpha amylase                        | 57                  | 109                | 8                   | 443                    | -                    | -                  |                               | B                  |                        |
| TPC1_12445 | Alpha/beta hydrolase family protein  | 45                  | 85                 | 12                  | 104                    | +                    | +                  |                               | B                  |                        |
| TPC1_13796 | Alpha/beta hydrolase family protein  | 45                  | 85                 | 6                   | 60                     | +                    | +                  |                               | B                  |                        |
| TPC1_14429 | Alpha/beta hydrolase family protein  | 45                  | 85                 | 11                  | 13                     | +                    | +                  |                               | B                  |                        |
| TPC1_14454 | Alpha/beta hydrolase family protein  | 45                  | 85                 | 3                   | 3                      | +                    | +                  |                               | B                  |                        |
| TPC1_12586 | Alpha/beta hydrolase fold-containing | 47                  | 91                 | 6                   | 7                      | -                    | -                  |                               | B-Proteobacteria   | 78                     |

| Transcript | annotation                                      | event# <sup>a</sup> | tree# <sup>b</sup> | #stops <sup>c</sup> | abundance <sup>d</sup> | Giardia <sup>e</sup> | Spiro <sup>f</sup> | other euks <sup>g</sup> | donor <sup>h</sup> | bootstrap <sup>h</sup> |
|------------|-------------------------------------------------|---------------------|--------------------|---------------------|------------------------|----------------------|--------------------|-------------------------|--------------------|------------------------|
|            | protein                                         |                     |                    |                     |                        |                      |                    |                         |                    |                        |
| TPC1_17405 | Alpha/beta hydrolase fold-containing protein    | 114                 | 220                | 11                  | 26                     | -                    | -                  |                         | B-Proteobacteria   | 84                     |
| TPC1_17868 | Alpha/beta hydrolase fold-containing protein    | 114                 | 220                | 9                   | 13                     | -                    | -                  |                         | B-Proteobacteria   | 84                     |
| TPC1_11670 | Alpha/beta hydrolase fold-containing protein    | 270                 | 220                | 6                   | 6                      | -                    | -                  |                         | B                  |                        |
| TPC1_16292 | Alpha/beta hydrolase fold-containing protein    | 270                 | 220                | 8                   | 20                     | -                    | -                  |                         | B                  |                        |
| TPC1_16708 | Alpha/beta hydrolase fold-containing protein    | 121                 | 232                | 2                   | 5                      | -                    | -                  |                         | B-Firmicutes       | 81                     |
| TPC1_15736 | Alpha-galactosidase                             | 100                 | 195                | 8                   | 30                     | -                    | ↓                  |                         | B                  |                        |
| TPC1_12584 | Amidohydrolase family protein                   | 187                 | 90                 | 8                   | 102                    | -                    | -                  |                         | B                  |                        |
| TPC1_15193 | Amidohydrolase family protein                   | 225                 | 176                | 10                  | 406                    | -                    | -                  | <i>Trichomonas</i>      | B-Chlamydiae       | 80                     |
| TPC1_13069 | Aminoacyl-histidine dipeptidase                 | 199                 | 118                | 8                   | 80                     | +                    | +                  | <i>Blastocystis</i>     | B                  |                        |
| TPC1_17722 | Aminoacyl-histidine dipeptidase                 | 199                 | 118                | 3                   | 4119                   | +                    | +                  | <i>Blastocystis</i>     | B                  |                        |
| TPC1_16106 | Aminoacyl-histidine dipeptidase                 | 109                 | 212                | 14                  | 14                     | -                    | ↓                  |                         | B-Proteobacteria   | 99                     |
| TPC1_11535 | Aminoglycoside phosphotransferase               | 30                  | 53                 | 10                  | 3                      | -                    | -                  |                         | B-Firmicutes       | 100                    |
| TPC1_14466 | Aminotransferase                                | 213                 | 152                | 11                  | 90                     | -                    | +                  |                         | B                  |                        |
| TPC1_11060 | Anaerobic ribonucleoside-triphosphate reductase | 19                  | 39                 | 4                   | 5                      | -                    | -                  |                         | B                  |                        |
| TPC1_13587 | Anaerobic ribonucleoside-triphosphate reductase | 70                  | 133                | 8                   | 5                      | -                    | -                  |                         | B                  |                        |
| TPC1_16250 | Anaerobic ribonucleoside-triphosphate reductase | 113                 | 218                | 13                  | 10                     | -                    | -                  |                         | V                  |                        |
| TPC1_12015 | ATPase, AAA family                              | 176                 | 68                 | 5                   | 3                      | -                    | +                  |                         | B                  |                        |
| TPC1_10227 | A-type flavoprotein                             | 6                   | 8                  | 6                   | 35                     | +                    | +                  |                         | B                  |                        |
| TPC1_11949 | A-type flavoprotein                             | 6                   | 64                 | 8                   | 5                      | +                    | +                  | <i>Trichomonas</i>      | B                  |                        |
| TPC1_15207 | A-type flavoprotein                             | 6                   | 64                 | 7                   | 151                    | +                    | +                  | <i>Trichomonas</i>      | B                  |                        |
| TPC1_10917 | A-type flavoprotein                             | 6                   | 128                | 18                  | 33                     | +                    | +                  |                         | B                  |                        |
| TPC1_13423 | A-type flavoprotein                             | 6                   | 128                | 4                   | 111                    | +                    | +                  |                         | B                  |                        |
| TPC1_15158 | A-type flavoprotein                             | 6                   | 128                | 6                   | 562                    | +                    | +                  |                         | B                  |                        |
| TPC1_16505 | A-type flavoprotein                             | 6                   | 228                | 5                   | 82                     | +                    | +                  | <i>Trichomonas</i>      | B                  |                        |
| TPC1_12933 | Beta-galactosidase                              | 195                 | 108                | 16                  | 9                      | -                    | +                  | <i>Tetrahymena</i>      | B                  |                        |

| Transcript | annotation                                                          | event# <sup>a</sup> | tree# <sup>b</sup> | #stops <sup>c</sup> | abundance <sup>d</sup> | Giardia <sup>e</sup> | Spiro <sup>f</sup> | other euks <sup>g</sup> | donor <sup>h</sup> | bootstrap <sup>h</sup> |
|------------|---------------------------------------------------------------------|---------------------|--------------------|---------------------|------------------------|----------------------|--------------------|-------------------------|--------------------|------------------------|
| TPC1_10343 | Beta-lactamase superfamily domain-containing protein                | 152                 | 20                 | 9                   | 31                     | -                    | -                  |                         | B                  |                        |
| TPC1_10653 | Beta-lactamase superfamily domain-containing protein                | 152                 | 20                 | 10                  | 13                     | -                    | -                  |                         | B                  |                        |
| TPC1_11041 | Beta-lactamase superfamily domain-containing protein                | 152                 | 20                 | 6                   | 4                      | -                    | -                  |                         | B                  |                        |
| TPC1_14503 | Beta-lactamase superfamily domain-containing protein                | 152                 | 20                 | 15                  | 3                      | -                    | -                  |                         | B                  |                        |
| TPC1_16221 | Biotin operon repressor/biotin--[acetyl-CoA-carboxylase] synthetase | 111                 | 214                | 3                   | 5                      | - <sup>m</sup>       | -                  |                         | B                  |                        |
| TPC1_11312 | Calcineurin-like phosphoesterase                                    | 130                 | 247                | 12                  | 19                     | +                    | +                  |                         | B                  |                        |
| TPC1_12598 | Calcineurin-like phosphoesterase                                    | 130                 | 247                | 14                  | 6                      | +                    | +                  |                         | B                  |                        |
| TPC1_13037 | Calcineurin-like phosphoesterase                                    | 130                 | 247                | 8                   | 6                      | +                    | +                  |                         | B                  |                        |
| TPC1_17158 | Calcineurin-like phosphoesterase                                    | 130                 | 247                | 8                   | 12                     | +                    | +                  |                         | B                  |                        |
| TPC1_12473 | Carbamate kinase                                                    | 184                 | 86                 | 4                   | 397                    | +                    | +                  | <i>Carpodidemonas</i>   | B                  |                        |
| TPC1_15874 | CDP-alcohol phosphatidyltransferase domain-containing protein       | 103                 | 202                | 0                   | 15                     | +                    | +                  |                         | B-Proteobacteria   | 86                     |
| TPC1_15220 | CDP-diacylglycerol-glycerol-3-phosphate 3-phosphatidyltransferase   | 226                 | 177                | 2                   | 53                     | +                    | + <sup>l</sup>     |                         | B                  |                        |
| TPC1_12914 | Cell wall-associated hydrolase                                      | 56                  | 107                | 2                   | 1754                   | -                    | -                  |                         | B-Bacteroidetes    | 72                     |
| TPC1_14960 | Cell wall-associated hydrolase                                      | 219                 | 166                | 1                   | 242                    | -                    | -                  |                         | B                  |                        |
| TPC1_11775 | Cell wall-associated hydrolase, invasion-associated protein         | 3                   | 3                  | 4                   | 17                     | -                    | -                  |                         | B                  |                        |
| TPC1_12821 | Cell wall-associated hydrolase, invasion-associated protein         | 3                   | 3                  | 6                   | 16                     | -                    | -                  |                         | B                  |                        |
| TPC1_14528 | Cell wall-associated hydrolase, invasion-associated protein         | 3                   | 3                  | 4                   | 56                     | -                    | -                  |                         | B                  |                        |
| TPC1_10045 | Cell wall-associated hydrolase, invasion-associated protein         | 231                 | 182                | 2                   | 26                     | -                    | -                  | <i>Trichomonas</i>      | B                  |                        |
| TPC1_15346 | Cell wall-associated hydrolase, invasion-associated protein         | 231                 | 182                | 2                   | 17                     | -                    | -                  | <i>Trichomonas</i>      | B                  |                        |
| TPC1_16207 | Cell wall-associated hydrolase, invasion-associated protein         | 231                 | 182                | 6                   | 42                     | -                    | -                  | <i>Trichomonas</i>      | B                  |                        |
| TPC1_10785 | Clan MH, family M20, peptidase T-like metallopeptidase              | 157                 | 29                 | 4                   | 2712                   | -                    | -                  | <i>Trichomonas</i>      | B                  |                        |
| TPC1_10503 | Conserved hypothetical protein                                      | 9                   | 16                 | 10                  | 11                     | -                    | -                  |                         | B                  |                        |
| TPC1_12280 | Conserved hypothetical protein                                      | 44                  | 80                 | 28                  | 3                      | -                    | -                  |                         | B                  |                        |
| TPC1_12567 | Conserved hypothetical protein                                      | 186                 | 89                 | 28                  | 1934                   | +                    | +                  |                         | B                  |                        |
| TPC1_12830 | Conserved hypothetical protein                                      | 52                  | 103                | 2                   | 1136                   | -                    | +                  |                         | B                  |                        |

| Transcript | annotation                                                     | event# <sup>a</sup> | tree# <sup>b</sup> | #stops <sup>c</sup> | abundance <sup>d</sup> | Giardia <sup>e</sup> | Spiro <sup>f</sup> | other euks <sup>g</sup>                                        | donor <sup>h</sup> | bootstrap <sup>h</sup> |
|------------|----------------------------------------------------------------|---------------------|--------------------|---------------------|------------------------|----------------------|--------------------|----------------------------------------------------------------|--------------------|------------------------|
| TPC1_13765 | Conserved hypothetical protein                                 | 72                  | 136                | 5                   | 4                      | -                    | -                  |                                                                | B-Proteobacteria   | 98                     |
| TPC1_16724 | Conserved hypothetical protein                                 | 72                  | 136                | 1                   | 9                      | -                    | -                  |                                                                | B-Proteobacteria   | 98                     |
| TPC1_14603 | Conserved hypothetical protein                                 | 88                  | 159                | 2                   | 2                      | -                    | -                  |                                                                | B-Bacteroidetes    | 75                     |
| TPC1_12360 | Conserved hypothetical protein                                 | 230                 | 181                | 9                   | 15                     | +                    | +                  |                                                                | B                  |                        |
| TPC1_15334 | Conserved hypothetical protein                                 | 230                 | 181                | 8                   | 45                     | +                    | +                  |                                                                | B                  |                        |
| TPC1_15387 | Conserved hypothetical protein                                 | 232                 | 183                | 13                  | 7                      | -                    | -                  |                                                                | B                  |                        |
| TPC1_11905 | Conserved hypothetical protein                                 | 133                 | 251                | 7                   | 5                      | -                    | +                  |                                                                | B                  |                        |
| TPC1_14065 | Conserved hypothetical protein                                 | 133                 | 251                | 2                   | 75                     | -                    | +                  |                                                                | B                  |                        |
| TPC1_17297 | Conserved hypothetical protein                                 | 133                 | 251                | 0                   | 13450                  | -                    | +                  |                                                                | B                  |                        |
| TPC1_15085 | CTP synthase                                                   | 221                 | 170                | 11                  | 28                     | -                    | +                  |                                                                | B                  |                        |
| TPC1_13600 | Cyd operon protein YbgT                                        | 71                  | 134                | 1                   | 3                      | -                    | -                  |                                                                | B                  |                        |
| TPC1_13324 | Cysteine synthase A                                            | 205                 | 126                | 3                   | 4233                   | -                    | +                  |                                                                | B                  |                        |
| TPC1_16598 | Deoxycytidine triphosphate deaminase                           | 254                 | 229                | 9                   | 19                     | -                    | -                  | <i>Dictyostelium,</i><br><i>Entamoeba,</i><br><i>Naegleria</i> | B                  |                        |
| TPC1_16233 | Deoxyribose-phosphate aldolase                                 | 247                 | 216                | 6                   | 163                    | +                    | +                  |                                                                | B                  |                        |
| TPC1_17796 | Deoxyuridine 5'-triphosphate nucleotidohydrolase               | 267                 | 266                | 1                   | 50                     | -                    | - <sup>j</sup>     |                                                                | B                  |                        |
| TPC1_10071 | Dihydropyrimidinase                                            | 39                  | 73                 | 17                  | 272                    | -                    | -                  |                                                                | A                  |                        |
| TPC1_12142 | Dihydropyrimidinase                                            | 39                  | 73                 | 6                   | 1776                   | -                    | -                  |                                                                | A                  |                        |
| TPC1_10712 | Dihydropyrimidine dehydrogenase                                | 153                 | 24                 | 15                  | 215                    | -                    | -                  |                                                                | B                  |                        |
| TPC1_14840 | DNA mismatch repair protein MutL                               | 218                 | 164                | 6                   | 2                      | +                    | +                  | <i>Candida,</i><br><i>Monosiga</i>                             | B                  |                        |
| TPC1_17450 | DNA-binding protein, putative                                  | 137                 | 257                | 1                   | 2                      | -                    | -                  |                                                                | B-Proteobacteria   | 82                     |
| TPC1_17303 | DNA-directed RNA polymerase                                    | 135                 | 253                | 5                   | 18                     | -                    | + <sup>i</sup>     |                                                                | A                  | 75                     |
| TPC1_12177 | Ethanolamine ammonia-lyase large subunit (EutB) family protein | 42                  | 76                 | 16                  | 17                     | -                    | -                  |                                                                | B                  |                        |
| TPC1_11309 | Ethanolamine ammonia-lyase light chain (EutC) family protein   | 26                  | 49                 | 3                   | 26                     | -                    | -                  |                                                                | B                  |                        |
| TPC1_11509 | Extracellular nuclease                                         | 190                 | 96                 | 12                  | 15                     | +                    | +                  | <i>Trichomonas</i>                                             | B                  |                        |
| TPC1_12647 | Extracellular nuclease                                         | 190                 | 96                 | 2                   | 209                    | +                    | +                  | <i>Trichomonas</i>                                             | B                  |                        |
| TPC1_15484 | Extracellular nuclease                                         | 265                 | 264                | 5                   | 175                    | +                    | +                  | <i>Trichomonas</i>                                             | B                  |                        |
| TPC1_17709 | Extracellular nuclease                                         | 265                 | 264                | 5                   | 247                    | +                    | +                  | <i>Trichomonas</i>                                             | B                  |                        |

| Transcript | annotation                                                     | event# <sup>a</sup> | tree# <sup>b</sup> | #stops <sup>c</sup> | abundance <sup>d</sup> | Giardia <sup>e</sup> | Spiro <sup>f</sup> | other euks <sup>g</sup> | donor <sup>h</sup> | bootstrap <sup>h</sup> |
|------------|----------------------------------------------------------------|---------------------|--------------------|---------------------|------------------------|----------------------|--------------------|-------------------------|--------------------|------------------------|
| TPC1_11248 | FAD/FMN dependent oxidoreductase                               | 25                  | 46                 | 3                   | 2                      | -                    | +                  |                         | B                  |                        |
| TPC1_16797 | FAD/FMN dependent oxidoreductase                               | 25                  | 46                 | 8                   | 704                    | -                    | +                  |                         | B                  |                        |
| TPC1_17518 | FAD/FMN dependent oxidoreductase                               | 25                  | 46                 | 10                  | 18                     | -                    | +                  |                         | B                  |                        |
| TPC1_12093 | Fe-S protein assembly chaperone HscA domain-containing protein | 37                  | 70                 | 3                   | 3                      | -                    | +                  |                         | B-Cyanobacteria    | 82                     |
| TPC1_15457 | Fe-S protein assembly chaperone HscA domain-containing protein | 37                  | 70                 | 24                  | 9                      | -                    | +                  |                         | B-Cyanobacteria    | 82                     |
| TPC1_16870 | Fe-S protein assembly chaperone HscA domain-containing protein | 37                  | 70                 | 6                   | 5                      | -                    | +                  |                         | B-Cyanobacteria    | 82                     |
| TPC1_17581 | Fe-S protein assembly chaperone HscA domain-containing protein | 37                  | 70                 | 19                  | 25                     | -                    | +                  |                         | B-Cyanobacteria    | 82                     |
| TPC1_13430 | Formate C-acetyltransferase                                    | 67                  | 129                | 10                  | 476                    | -                    | -                  |                         | B                  |                        |
| TPC1_14534 | Fructokinase                                                   | 83                  | 154                | 17                  | 5                      | + <sup>k</sup>       | + <sup>l</sup>     |                         | B                  |                        |
| TPC1_16710 | Fructose-1,6-bisphosphate aldolase                             | 122                 | 233                | 5                   | 3801                   | + <sup>k</sup>       | + <sup>l</sup>     |                         | B                  |                        |
| TPC1_10001 | Glucan endo-1,6-beta-glucosidase                               | 1                   | 1                  | 15                  | 13                     | -                    | -                  |                         | B                  |                        |
| TPC1_11777 | Glucosamine-6-phosphate deaminase                              | 169                 | 59                 | 14                  | 13                     | +                    | +                  |                         | B                  |                        |
| TPC1_12419 | Glucose-6-phosphate isomerase                                  | 183                 | 84                 | 17                  | 43                     | +                    | +                  | <i>Trichomonas</i>      | B                  |                        |
| TPC1_11886 | Glutamine synthetase                                           | 120                 | 231                | 14                  | 6                      | -                    | -                  |                         | B-Firmicutes       | 74                     |
| TPC1_16673 | Glutamine synthetase                                           | 120                 | 231                | 4                   | 6                      | -                    | -                  |                         | B-Firmicutes       | 74                     |
| TPC1_10201 | Glutamine synthetase catalytic region                          | 145                 | 6                  | 11                  | 6                      | -                    | -                  |                         | B                  |                        |
| TPC1_14343 | Glutamine synthetase type III                                  | 211                 | 150                | 2                   | 6                      | -                    | -                  |                         | B                  |                        |
| TPC1_10233 | Glutamine--fructose-6-phosphate aminotransferase [isomerizing] | 146                 | 9                  | 16                  | 118                    | -                    | -                  |                         | B                  |                        |
| TPC1_10306 | Glycerate kinase                                               | 149                 | 13                 | 14                  | 23                     | -                    | +                  |                         | B                  |                        |
| TPC1_13007 | Glycerol dehydrogenase                                         | 198                 | 116                | 13                  | 82                     | -                    | -                  |                         | B                  |                        |
| TPC1_10417 | Glycosidase PH1107-related protein                             | 132                 | 249                | 8                   | 42                     | -                    | -                  |                         | B-Bacteroidetes    | 70                     |
| TPC1_17199 | Glycosidase PH1107-related protein                             | 132                 | 249                | 13                  | 9                      | -                    | -                  |                         | B-Bacteroidetes    | 70                     |
| TPC1_10248 | Glycoside hydrolase family 3 protein                           | 147                 | 10                 | 11                  | 700                    | -                    | -                  |                         | B                  |                        |
| TPC1_15120 | Glycosyl hydrolase family 2 protein                            | 222                 | 173                | 21                  | 19                     | -                    | -                  |                         | B                  |                        |
| TPC1_10339 | Glycosyl transferase family 2 protein                          | 31                  | 14                 | 6                   | 3                      | -                    | -                  |                         | B                  |                        |
| TPC1_14747 | Glycosyl transferase family 2 protein                          | 31                  | 14                 | 5                   | 280                    | -                    | -                  |                         | B                  |                        |
| TPC1_11552 | Glycosyl transferase family 2 protein                          | 31                  | 54                 | 3                   | 6                      | -                    | -                  |                         | B                  |                        |

| Transcript | annotation                                                     | event# <sup>a</sup> | tree# <sup>b</sup> | #stops <sup>c</sup> | abundance <sup>d</sup> | Giardia <sup>e</sup> | Spiro <sup>f</sup> | other euks <sup>g</sup> | donor <sup>h</sup> | bootstrap <sup>h</sup> |
|------------|----------------------------------------------------------------|---------------------|--------------------|---------------------|------------------------|----------------------|--------------------|-------------------------|--------------------|------------------------|
| TPC1_15134 | Glycosyl transferase family 2 protein                          | 31                  | 54                 | 6                   | 202                    | -                    | -                  |                         | B                  |                        |
| TPC1_16989 | Glycosyl transferase family 2 protein                          | 31                  | 54                 | 6                   | 466                    | -                    | -                  |                         | B                  |                        |
| TPC1_17183 | Glycosyl transferase family 2 protein                          | 31                  | 54                 | 3                   | 21                     | -                    | -                  |                         | B                  |                        |
| TPC1_11304 | Glycosyl transferases group 1 family protein                   | 62                  | 117                | 11                  | 17                     | -                    | -                  |                         | B                  |                        |
| TPC1_13016 | Glycosyl transferases group 1 family protein                   | 62                  | 117                | 8                   | 8                      | -                    | -                  |                         | B                  |                        |
| TPC1_17473 | Glycosyl transferases group 1 family protein                   | 62                  | 117                | 4                   | 8                      | -                    | -                  |                         | B                  |                        |
| TPC1_17626 | Glycosyl transferases group 1 family protein                   | 62                  | 117                | 14                  | 11                     | -                    | -                  |                         | B                  |                        |
| TPC1_13228 | Glycosyl transferases group 1 protein                          | 202                 | 123                | 9                   | 5                      | -                    | -                  |                         | B                  |                        |
| TPC1_12153 | Glycosyltransferase                                            | 40                  | 74                 | 9                   | 19                     | -                    | -                  |                         | B                  |                        |
| TPC1_17062 | Glycosyltransferase                                            | 138                 | 258                | 9                   | 4                      | -                    | -                  |                         | B                  |                        |
| TPC1_17488 | Glycosyltransferase                                            | 138                 | 258                | 11                  | 26                     | -                    | -                  |                         | B                  |                        |
| TPC1_11246 | GNAT family acetyltransferase                                  | 164                 | 45                 | 10                  | 31                     | -                    | -                  |                         | B                  |                        |
| TPC1_10729 | HAD family hydrolase                                           | 15                  | 25                 | 9                   | 11                     | -                    | -                  |                         | B                  |                        |
| TPC1_12485 | HAD family hydrolase                                           | 15                  | 25                 | 10                  | 23                     | -                    | -                  |                         | B                  |                        |
| TPC1_15952 | HAD family hydrolase                                           | 15                  | 25                 | 12                  | 8                      | -                    | -                  |                         | B                  |                        |
| TPC1_11125 | HAD family hydrolase                                           | 78                  | 142                | 2                   | 4                      | -                    | -                  |                         | B                  |                        |
| TPC1_12218 | HAD family hydrolase                                           | 78                  | 142                | 2                   | 7                      | -                    | -                  |                         | B                  |                        |
| TPC1_14039 | HAD family hydrolase                                           | 78                  | 142                | 4                   | 3                      | -                    | -                  |                         | B                  |                        |
| TPC1_13754 | Haloacid dehalogenase-like hydrolase domain-containing protein | 78                  | 142                | 6                   | 65                     | -                    | -                  |                         | B                  |                        |
| TPC1_17196 | Haloacid dehalogenase-like hydrolase domain-containing protein | 131                 | 248                | 6                   | 8                      | -                    | -                  |                         | B                  |                        |
| TPC1_10675 | Haloacid dehalogenase-like hydrolase family protein            | 13 <sup>n</sup>     | 22                 | 3                   | 11                     | +                    | -                  |                         | B                  |                        |
| TPC1_10898 | Hemolysin III family protein                                   | 159                 | 33                 | 1                   | 10                     | -                    | +                  |                         | B-Thermotogae      | 71                     |
| TPC1_16467 | Hemolysin III family protein                                   | 251                 | 226                | 2                   | 32                     | -                    | + <sup>l</sup>     |                         | B                  |                        |
| TPC1_14100 | Histidinol phosphate phosphatase HisJ family protein           | 208                 | 144                | 9                   | 3                      | +                    | + <sup>l</sup>     |                         | B                  |                        |
| TPC1_16817 | Histidinol phosphate phosphatase HisJ family protein           | 208                 | 144                | 14                  | 388                    | +                    | + <sup>l</sup>     |                         | B                  |                        |
| TPC1_11046 | Homospermidine synthase                                        | 163                 | 38                 | 2                   | 1749                   | -                    | -                  |                         | B                  |                        |
| TPC1_16966 | Hybrid cluster protein                                         | 259                 | 244                | 7                   | 378                    | +                    | +                  | <i>Entamoeba</i>        | B                  |                        |

| Transcript | annotation                                   | event# <sup>a</sup> | tree# <sup>b</sup> | #stops <sup>c</sup> | abundance <sup>d</sup> | Giardia <sup>e</sup> | Spiro <sup>f</sup> | other euks <sup>g</sup> | donor <sup>h</sup> | bootstrap <sup>h</sup> |
|------------|----------------------------------------------|---------------------|--------------------|---------------------|------------------------|----------------------|--------------------|-------------------------|--------------------|------------------------|
| TPC1_14995 | Hydrolase, haloacid dehalogenase-like family | 234                 | 186                | 3                   | 27                     | +                    | +                  |                         | B                  |                        |
| TPC1_15505 | Hydrolase, haloacid dehalogenase-like family | 234                 | 186                | 11                  | 308                    | +                    | +                  |                         | B                  |                        |
| TPC1_12607 | Hydroxyacylglutathione hydrolase             | 188                 | 92                 | 11                  | 10                     | +                    | +                  | <i>Salpingoeca</i>      | B                  |                        |
| TPC1_15076 | Hydroxyacylglutathione hydrolase             | 188                 | 92                 | 10                  | 15                     | +                    | +                  | <i>Salpingoeca</i>      | B                  |                        |
| TPC1_16889 | Hydroxyacylglutathione hydrolase             | 188                 | 92                 | 5                   | 30                     | +                    | +                  | <i>Salpingoeca</i>      | B                  |                        |
| TPC1_17548 | Hydroxyacylglutathione hydrolase             | 188                 | 92                 | 14                  | 49                     | +                    | +                  | <i>Salpingoeca</i>      | B                  |                        |
| TPC1_10673 | Hypothetical protein                         | 12                  | 21                 | 2                   | 24                     | -                    | -                  |                         | B-Proteobacteria   | 87                     |
| TPC1_11740 | Hypothetical protein                         | 33                  | 58                 | 5                   | 550                    | -                    | -                  |                         | B-Caldiserica      | 99                     |
| TPC1_12617 | Hypothetical protein                         | 49                  | 94                 | 4                   | 2                      | -                    | -                  |                         | B-Cyanobacteria    | 91                     |
| TPC1_13307 | Hypothetical protein                         | 203                 | 124                | 9                   | 330                    | +                    | +                  | <i>Trichomonas</i>      | A-Euryarchaeota    | 100                    |
| TPC1_13657 | Hypothetical protein                         | 207                 | 135                | 5                   | 9                      | -                    | -                  |                         | B                  |                        |
| TPC1_14116 | Hypothetical protein                         | 80                  | 145                | 3                   | 106                    | -                    | -                  |                         | B                  |                        |
| TPC1_11116 | Hypothetical protein                         | 87                  | 158                | 6                   | 3                      | -                    | -                  |                         | B                  |                        |
| TPC1_14559 | Hypothetical protein                         | 87                  | 158                | 9                   | 5                      | -                    | -                  |                         | B                  |                        |
| TPC1_15016 | Hypothetical protein                         | 92                  | 168                | 13                  | 21                     | -                    | -                  |                         | B                  | 91                     |
| TPC1_10733 | Hypothetical protein                         | 99                  | 194                | 8                   | 352                    | -                    | -                  |                         | B                  |                        |
| TPC1_11162 | Hypothetical protein                         | 99                  | 194                | 5                   | 10                     | -                    | -                  |                         | B                  |                        |
| TPC1_15735 | Hypothetical protein                         | 99                  | 194                | 8                   | 45                     | -                    | -                  |                         | B                  |                        |
| TPC1_17564 | Hypothetical protein                         | 99                  | 194                | 9                   | 45                     | -                    | -                  |                         | B                  |                        |
| TPC1_17622 | Hypothetical protein                         | 99                  | 194                | 4                   | 173                    | -                    | -                  |                         | B                  |                        |
| TPC1_16091 | Hypothetical protein                         | 108                 | 211                | 7                   | 37                     | -                    | -                  |                         | B                  |                        |
| TPC1_11212 | Inorganic diphosphatase                      | 24                  | 44                 | 25                  | 248                    | +                    | +                  |                         | B                  |                        |
| TPC1_11681 | Inorganic diphosphatase                      | 24                  | 44                 | 16                  | 10                     | +                    | +                  |                         | B                  |                        |
| TPC1_11752 | Inorganic diphosphatase                      | 24                  | 44                 | 14                  | 5                      | +                    | +                  |                         | B                  |                        |
| TPC1_12030 | Inorganic diphosphatase                      | 24                  | 44                 | 25                  | 57                     | +                    | +                  |                         | B                  |                        |
| TPC1_13319 | Inorganic diphosphatase                      | 24                  | 44                 | 18                  | 15                     | +                    | +                  |                         | B                  |                        |
| TPC1_10032 | Inosine-uridine nucleoside N-ribohydrolase   | 2                   | 2                  | 3                   | 4                      | +                    | +                  |                         | B-Proteobacteria   | 92                     |
| TPC1_12194 | Inosine-uridine nucleoside N-ribohydrolase   | 2                   | 2                  | 4                   | 6                      | +                    | +                  |                         | B-Proteobacteria   | 92                     |



| Transcript | annotation                                               | event# <sup>a</sup> | tree# <sup>b</sup> | #stops <sup>c</sup> | abundance <sup>d</sup> | Giardia <sup>e</sup> | Spiro <sup>f</sup> | other euks <sup>g</sup> | donor <sup>h</sup> | bootstrap <sup>h</sup> |
|------------|----------------------------------------------------------|---------------------|--------------------|---------------------|------------------------|----------------------|--------------------|-------------------------|--------------------|------------------------|
| TPC1_16010 | Integral membrane protein                                | 106                 | 209                | 4                   | 40                     | -                    | -                  |                         | B                  |                        |
| TPC1_11014 | Integrase core domain-containing protein                 | 18                  | 35                 | 2                   | 8                      | -                    | -                  |                         | B-Aquificae        | 77                     |
| TPC1_17115 | Integrase core domain-containing protein                 | 18                  | 35                 | 5                   | 25                     | -                    | -                  |                         | B-Aquificae        | 77                     |
| TPC1_17442 | Integrase core domain-containing protein                 | 18                  | 35                 | 6                   | 39                     | -                    | -                  |                         | B-Aquificae        | 77                     |
| TPC1_11299 | Integrase core domain-containing protein                 | 166                 | 48                 | 2                   | 3                      | -                    | -                  | <i>Trichomonas</i>      | B                  |                        |
| TPC1_16923 | Internalin                                               | 128                 | 243                | 17                  | 57                     | -                    | -                  |                         | B                  |                        |
| TPC1_11947 | ISPsy20, transposase IstB                                | 172                 | 63                 | 1                   | 3                      | -                    | -                  |                         | B                  |                        |
| TPC1_17531 | L-fucose isomerase, C-terminal domain-containing protein | 264                 | 260                | 13                  | 18                     | -                    | -                  |                         | B                  |                        |
| TPC1_15110 | Lipolytic enzyme, G-D-S-L family                         | 94                  | 172                | 8                   | 55                     | +                    | +                  |                         | B                  |                        |
| TPC1_15477 | L-serine dehydratase                                     | 239                 | 196                | 18                  | 123                    | +                    | +                  | <i>Blastocystis</i>     | B                  |                        |
| TPC1_15757 | L-serine dehydratase                                     | 239                 | 196                | 14                  | 39                     | +                    | +                  | <i>Blastocystis</i>     | B                  |                        |
| TPC1_15107 | L-seryl-tRNA(Sec) kinase                                 | 93                  | 171                | 6                   | 4                      | -                    | + <sup>l</sup>     |                         | B                  |                        |
| TPC1_17861 | Lysine-2,3-aminomutase                                   | 268                 | 268                | 3                   | 3                      | -                    | -                  |                         | B                  |                        |
| TPC1_13093 | LysM domain-containing protein                           | 64                  | 120                | 5                   | 7                      | -                    | -                  |                         | B-Firmicutes       | 94                     |
| TPC1_12384 | Lysozyme family protein                                  | 182                 | 83                 | 2                   | 6                      | -                    | -                  |                         | B                  |                        |
| TPC1_14539 | Lysozyme family protein                                  | 86                  | 157                | 1                   | 2858                   | -                    | -                  | <i>Trichomonas</i>      | B                  |                        |
| TPC1_12700 | Lysozyme family protein                                  | 271                 | 157                | 4                   | 192                    | -                    | -                  |                         | B                  |                        |
| TPC1_13482 | M18 family aminopeptidase                                | 69                  | 131                | 12                  | 564                    | -                    | + <sup>l</sup>     |                         | B-Spirochaetes     | 83                     |
| TPC1_15939 | M18 family aminopeptidase                                | 105                 | 205                | 11                  | 560                    | -                    | +                  |                         | B                  |                        |
| TPC1_10110 | Major facilitator superfamily protein                    | 11                  | 19                 | 11                  | 67                     | +                    | +                  |                         | B                  |                        |
| TPC1_10640 | Major facilitator superfamily protein                    | 11                  | 19                 | 13                  | 18                     | +                    | +                  |                         | B                  |                        |
| TPC1_10930 | Major facilitator superfamily protein                    | 160                 | 34                 | 4                   | 28                     | +                    | +                  |                         | B                  |                        |
| TPC1_12121 | Major facilitator superfamily protein                    | 160                 | 34                 | 3                   | 5                      | +                    | +                  |                         | B                  |                        |
| TPC1_11911 | Major facilitator superfamily protein                    | 38                  | 71                 | 11                  | 36                     | +                    | +                  |                         | B                  |                        |
| TPC1_12094 | Major facilitator superfamily protein                    | 38                  | 71                 | 5                   | 12                     | +                    | +                  |                         | B                  |                        |
| TPC1_12596 | Major facilitator superfamily protein                    | 38                  | 71                 | 9                   | 12                     | +                    | +                  |                         | B                  |                        |
| TPC1_13368 | Major facilitator superfamily protein                    | 38                  | 71                 | 7                   | 29                     | +                    | +                  |                         | B                  |                        |
| TPC1_14043 | Major facilitator superfamily protein                    | 38                  | 71                 | 3                   | 17                     | +                    | +                  |                         | B                  |                        |
| TPC1_16033 | Major facilitator superfamily protein                    | 38                  | 71                 | 9                   | 187                    | +                    | +                  |                         | B                  |                        |

| Transcript | annotation                                         | event# <sup>a</sup> | tree# <sup>b</sup> | #stops <sup>c</sup> | abundance <sup>d</sup> | Giardia <sup>e</sup> | Spiro <sup>f</sup> | other euks <sup>g</sup> | donor <sup>h</sup> | bootstrap <sup>h</sup> |
|------------|----------------------------------------------------|---------------------|--------------------|---------------------|------------------------|----------------------|--------------------|-------------------------|--------------------|------------------------|
| TPC1_17484 | Major facilitator superfamily protein              | 38                  | 71                 | 6                   | 5                      | +                    | +                  |                         | B                  |                        |
| TPC1_10457 | Major facilitator superfamily protein              | 77                  | 141                | 9                   | 32                     | +                    | +                  |                         | B                  |                        |
| TPC1_13646 | Major facilitator superfamily protein              | 77                  | 141                | 9                   | 10                     | +                    | +                  |                         | B                  |                        |
| TPC1_13712 | Major facilitator superfamily protein              | 77                  | 141                | 13                  | 55                     | +                    | +                  |                         | B                  |                        |
| TPC1_13968 | Major facilitator superfamily protein              | 77                  | 141                | 9                   | 7                      | +                    | +                  |                         | B                  |                        |
| TPC1_15539 | Major facilitator superfamily protein              | 77                  | 141                | 10                  | 11                     | +                    | +                  |                         | B                  |                        |
| TPC1_15561 | Major facilitator superfamily protein              | 77                  | 141                | 5                   | 4                      | +                    | +                  |                         | B                  |                        |
| TPC1_16922 | Major facilitator superfamily protein              | 77                  | 141                | 7                   | 7                      | +                    | +                  |                         | B                  |                        |
| TPC1_15503 | Major Facilitator Superfamily protein              | 233                 | 185                | 1                   | 11                     | -                    | -                  |                         | B                  |                        |
| TPC1_12980 | Mannose-6-phosphate isomerase                      | 59                  | 112                | 11                  | 33                     | -                    | -                  |                         | B                  |                        |
| TPC1_12364 | MatE efflux family protein                         | 181                 | 82                 | 5                   | 23                     | +                    | +                  | <i>Trichomonas</i>      | B                  |                        |
| TPC1_14906 | MatE efflux family protein                         | 181                 | 82                 | 1                   | 48                     | +                    | +                  | <i>Trichomonas</i>      | B                  |                        |
| TPC1_15610 | MatE efflux family protein                         | 125                 | 190                | 19                  | 347                    | +                    | +                  |                         | B                  |                        |
| TPC1_11032 | MatE efflux family protein                         | 125                 | 239                | 3                   | 908                    | +                    | +                  |                         | B                  |                        |
| TPC1_11668 | MatE efflux family protein                         | 125                 | 239                | 4                   | 111                    | +                    | +                  |                         | B                  |                        |
| TPC1_15604 | MatE efflux family protein                         | 125                 | 239                | 14                  | 10                     | +                    | +                  |                         | B                  |                        |
| TPC1_16836 | MatE efflux family protein                         | 125                 | 239                | 10                  | 22                     | +                    | +                  |                         | B                  |                        |
| TPC1_17760 | MatE efflux family protein                         | 125                 | 239                | 6                   | 28                     | +                    | +                  |                         | B                  |                        |
| TPC1_16712 | MDR-type permease                                  | 123                 | 234                | 11                  | 83                     | +                    | +                  |                         | B                  |                        |
| TPC1_12681 | Metallo-beta-lactamase superfamily protein         | 191                 | 97                 | 6                   | 602                    | +                    | +                  |                         | B                  |                        |
| TPC1_16054 | Metalloprotease, insulinase family protein         | 107                 | 210                | 18                  | 210                    | -                    | +                  |                         | B-Proteobacteria   | 70                     |
| TPC1_16409 | Metalloprotease, insulinase family protein         | 107                 | 210                | 31                  | 102                    | -                    | +                  |                         | B-Proteobacteria   | 70                     |
| TPC1_13001 | Methionine gamma-lyase                             | 197                 | 115                | 3                   | 26                     | -                    | -                  |                         | B                  |                        |
| TPC1_16747 | Methionine gamma-lyase                             | 124                 | 236                | 4                   | 252                    | -                    | -                  |                         | B-Proteobacteria   | 75                     |
| TPC1_17410 | Methionyl-tRNA synthetase                          | 263                 | 256                | 5                   | 26                     | +                    | +                  |                         | B                  |                        |
| TPC1_11697 | Methylated-DNA--protein-cysteine methyltransferase | 168                 | 57                 | 4                   | 11                     | -                    | -                  |                         | B                  |                        |
| TPC1_11946 | Methyltransferase domain-containing protein        | 97                  | 188                | 10                  | 6                      | -                    | -                  |                         | B-Chlamydiae       | 72                     |
| TPC1_15540 | Methyltransferase domain-containing protein        | 97                  | 188                | 3                   | 5                      | -                    | -                  |                         | B-Chlamydiae       | 72                     |

| Transcript | annotation                              | event# <sup>a</sup> | tree# <sup>b</sup> | #stops <sup>c</sup> | abundance <sup>d</sup> | Giardia <sup>e</sup> | Spiro <sup>f</sup> | other euks <sup>g</sup>                     | donor <sup>h</sup> | bootstrap <sup>h</sup> |
|------------|-----------------------------------------|---------------------|--------------------|---------------------|------------------------|----------------------|--------------------|---------------------------------------------|--------------------|------------------------|
| TPC1_12998 | Methyltransferase, FkbM family protein  | 209                 | 148                | 5                   | 4                      | -                    | -                  |                                             | B                  |                        |
| TPC1_14213 | Methyltransferase, FkbM family protein  | 209                 | 148                | 8                   | 21                     | -                    | -                  |                                             | B                  |                        |
| TPC1_17489 | Methyltransferase, FkbM family protein  | 209                 | 148                | 8                   | 43                     | -                    | -                  |                                             | B                  |                        |
| TPC1_12855 | MFS permease (Drug)                     | 54                  | 105                | 7                   | 49                     | -                    | -                  |                                             | B                  |                        |
| TPC1_12178 | Mismatch repair protein                 | 178                 | 77                 | 33                  | 6                      | - <sup>m</sup>       | + <sup>l</sup>     | <i>Chaetomium,</i><br><i>Myceliophthora</i> | B                  |                        |
| TPC1_12959 | Molybdopterin biosynthesis MoeB protein | 196                 | 110                | 11                  | 54                     | +                    | + <sup>l</sup>     |                                             | B                  |                        |
| TPC1_13193 | Myosin-cross-reactive antigen, putative | 200                 | 121                | 11                  | 274                    | -                    | -                  | <i>Trichomonas</i>                          | B                  |                        |
| TPC1_13213 | Myosin-cross-reactive antigen, putative | 212                 | 151                | 3                   | 682                    | -                    | -                  | <i>Trichomonas</i>                          | B                  |                        |
| TPC1_14447 | Myosin-cross-reactive antigen, putative | 212                 | 151                | 15                  | 81                     | -                    | -                  | <i>Trichomonas</i>                          | B                  |                        |
| TPC1_14561 | Myosin-cross-reactive antigen, putative | 212                 | 151                | 6                   | 1370                   | -                    | -                  | <i>Trichomonas</i>                          | B                  |                        |
| TPC1_12843 | N-acetyl-D-glucosamine kinase           | 272                 | 270                | 1                   | 30                     | -                    | -                  |                                             | B                  |                        |
| TPC1_10768 | N-acetylmuramoyl-L-alanine amidase      | 156                 | 28                 | 3                   | 55                     | -                    | -                  |                                             | B                  |                        |
| TPC1_11065 | N-acetylmuramoyl-L-alanine amidase      | 156                 | 28                 | 5                   | 14                     | -                    | -                  |                                             | B                  |                        |
| TPC1_11411 | N-acetylmuramoyl-L-alanine amidase      | 156                 | 28                 | 9                   | 34                     | -                    | -                  |                                             | B                  |                        |
| TPC1_16498 | N-acetylmuramoyl-L-alanine amidase      | 156                 | 28                 | 3                   | 922                    | -                    | -                  |                                             | B                  |                        |
| TPC1_11894 | NADH oxidase                            | 171                 | 62                 | 4                   | 5                      | - <sup>m</sup>       | +                  |                                             | B                  |                        |
| TPC1_12204 | NADH oxidase                            | 171                 | 62                 | 3                   | 29                     | - <sup>m</sup>       | +                  |                                             | B                  |                        |
| TPC1_12522 | NADH oxidase                            | 171                 | 62                 | 22                  | 26                     | - <sup>m</sup>       | +                  |                                             | B                  |                        |
| TPC1_14072 | NADH oxidase                            | 171                 | 62                 | 14                  | 244                    | - <sup>m</sup>       | +                  |                                             | B                  |                        |
| TPC1_17647 | NADH oxidase                            | 171                 | 62                 | 12                  | 471                    | - <sup>m</sup>       | +                  |                                             | B                  |                        |
| TPC1_13966 | NADH oxidase                            | 76                  | 140                | 9                   | 205                    | - <sup>m</sup>       | +                  |                                             | B                  |                        |
| TPC1_14799 | NADH oxidase                            | 76                  | 140                | 7                   | 1379                   | - <sup>m</sup>       | +                  |                                             | B                  |                        |
| TPC1_17869 | NADH oxidoreductase                     | 269                 | 269                | 3                   | 191                    | -                    | +                  |                                             | B                  |                        |
| TPC1_11192 | NADPH oxidoreductase                    | 22                  | 42                 | 3                   | 1190                   | - <sup>m</sup>       | +                  |                                             | B                  |                        |
| TPC1_10495 | NADPH oxidoreductase                    | 82                  | 147                | 6                   | 71                     | +                    | +                  |                                             | B                  |                        |
| TPC1_11001 | NADPH oxidoreductase                    | 82                  | 147                | 6                   | 52                     | +                    | +                  |                                             | B                  |                        |
| TPC1_14212 | NADPH oxidoreductase                    | 82                  | 147                | 0                   | 4677                   | +                    | +                  |                                             | B                  |                        |
| TPC1_13477 | N-carbamyl-L-cysteine amidohydrolase    | 68                  | 130                | 4                   | 1738                   | -                    | -                  |                                             | B-Firmicutes       | 99                     |
| TPC1_12990 | Nif3-related protein                    | 61                  | 114                | 5                   | 35                     | +                    | +                  |                                             | B-Thermotogae      | 78                     |

| Transcript | annotation                                                       | event# <sup>a</sup> | tree# <sup>b</sup> | #stops <sup>c</sup> | abundance <sup>d</sup> | Giardia <sup>e</sup> | Spiro <sup>f</sup> | other euks <sup>g</sup> | donor <sup>h</sup> | bootstrap <sup>h</sup> |
|------------|------------------------------------------------------------------|---------------------|--------------------|---------------------|------------------------|----------------------|--------------------|-------------------------|--------------------|------------------------|
| TPC1_15191 | Nitrilase/cyanide hydratase and apolipoprotein N-acyltransferase | 224                 | 175                | 10                  | 16                     | -                    | -                  |                         | B                  |                        |
| TPC1_10295 | Nitroreductase                                                   | 148                 | 12                 | 17                  | 32                     | +                    | +                  |                         | B                  |                        |
| TPC1_14280 | Nitroreductase                                                   | 148                 | 12                 | 12                  | 165                    | +                    | +                  |                         | B                  |                        |
| TPC1_14902 | Nitroreductase                                                   | 148                 | 12                 | 9                   | 761                    | +                    | +                  |                         | B                  |                        |
| TPC1_16575 | Nitroreductase                                                   | 148                 | 12                 | 10                  | 28                     | +                    | +                  |                         | B                  |                        |
| TPC1_11030 | Nitroreductase                                                   | 161                 | 36                 | 2                   | 3128                   | -                    | +                  |                         | B                  |                        |
| TPC1_12813 | Nitroreductase                                                   | 51                  | 101                | 1                   | 14                     | -                    | j                  |                         | B                  |                        |
| TPC1_11240 | NlpC/P60 family protein                                          | 194                 | 102                | 3                   | 98                     | -                    | -                  | <i>Trichomonas</i>      | B                  |                        |
| TPC1_11430 | NlpC/P60 family protein                                          | 194                 | 102                | 7                   | 19                     | -                    | -                  | <i>Trichomonas</i>      | B                  |                        |
| TPC1_16273 | NlpC/P60 family protein                                          | 194                 | 102                | 2                   | 20                     | -                    | -                  | <i>Trichomonas</i>      | B                  |                        |
| TPC1_16368 | NlpC/P60 family protein                                          | 194                 | 102                | 4                   | 53                     | -                    | -                  | <i>Trichomonas</i>      | B                  |                        |
| TPC1_16504 | NlpC/P60 family protein                                          | 194                 | 102                | 4                   | 332                    | -                    | -                  | <i>Trichomonas</i>      | B                  |                        |
| TPC1_17596 | NlpC/P60 family protein                                          | 194                 | 102                | 5                   | 4                      | -                    | -                  | <i>Trichomonas</i>      | B                  |                        |
| TPC1_15239 | NlpC/P60 family protein                                          | 227                 | 178                | 3                   | 49                     | -                    | -                  | <i>Trichomonas</i>      | B                  |                        |
| TPC1_15794 | NlpC/P60 family protein                                          | 227                 | 178                | 2                   | 38                     | -                    | -                  | <i>Trichomonas</i>      | B                  |                        |
| TPC1_10609 | NlpC/P60 family protein                                          | 231                 | 182                | 5                   | 55                     | -                    | -                  | <i>Trichomonas</i>      | B                  |                        |
| TPC1_11218 | NlpC/P60 family protein                                          | 231                 | 182                | 2                   | 168                    | -                    | -                  | <i>Trichomonas</i>      | B                  |                        |
| TPC1_17359 | NlpC/P60 family protein                                          | 231                 | 182                | 5                   | 117                    | -                    | -                  | <i>Trichomonas</i>      | B                  |                        |
| TPC1_14527 | NlpC/P60 family protein                                          | 115                 | 221                | 3                   | 26                     | -                    | -                  |                         | B                  |                        |
| TPC1_10803 | NMN adenylyl transferase and transcriptional regulator           | 158                 | 30                 | 10                  | 5                      | -                    | -                  |                         | B                  |                        |
| TPC1_16913 | Ornithine transcarbamylase                                       | 258                 | 242                | 3                   | 2871                   | -                    | j                  |                         | B                  |                        |
| TPC1_14145 | PD-(D/E)XK nuclease family transposase                           | 81                  | 146                | 6                   | 4                      | -                    | -                  |                         | B                  |                        |
| TPC1_17650 | Peptidase T                                                      | 142                 | 263                | 1                   | 2                      | -                    | +                  |                         | B                  |                        |
| TPC1_16181 | Peptidase T                                                      | 266                 | 265                | 9                   | 40                     | -                    | +                  | <i>Entamoeba</i>        | B                  |                        |
| TPC1_17778 | Peptidase T                                                      | 266                 | 265                | 10                  | 9                      | -                    | +                  | <i>Entamoeba</i>        | B                  |                        |
| TPC1_16167 | Peptide methionine sulfoxide reductase MsrA                      | 110                 | 213                | 10                  | 243                    | + <sup>k</sup>       | +                  |                         | B                  |                        |
| TPC1_17381 | Peptidoglycan-binding lysin domain containing protein            | 136                 | 255                | 4                   | 7                      | -                    | -                  |                         | B-Firmicutes       | 84                     |
| TPC1_15291 | Peptidyl-dipeptidase                                             | 228                 | 179                | 11                  | 806                    | -                    | +                  | <i>Entamoeba</i>        | B                  |                        |

| Transcript | annotation                                                     | event# <sup>a</sup> | tree# <sup>b</sup> | #stops <sup>c</sup> | abundance <sup>d</sup> | Giardia <sup>e</sup> | Spiro <sup>f</sup> | other euks <sup>g</sup>          | donor <sup>h</sup> | bootstrap <sup>h</sup> |
|------------|----------------------------------------------------------------|---------------------|--------------------|---------------------|------------------------|----------------------|--------------------|----------------------------------|--------------------|------------------------|
| TPC1_15012 | Periplasmic solute-binding protein                             | 91                  | 167                | 1                   | 2                      | -                    | -                  |                                  | B-Proteobacteria   | 98                     |
| TPC1_16423 | Phosphoacetylglucosamine mutase                                | 116                 | 223                | 10                  | 37                     | +                    | +                  |                                  | B                  |                        |
| TPC1_15786 | Phosphoglycerate mutase                                        | 101                 | 198                | 3                   | 3                      | +                    | +                  |                                  | B                  |                        |
| TPC1_16733 | Phosphoglycerate mutase                                        | 101                 | 198                | 7                   | 550                    | +                    | +                  |                                  | B                  |                        |
| TPC1_13403 | Phosphotransferase family protein                              | 65                  | 127                | 8                   | 2                      | -                    | -                  |                                  | B                  |                        |
| TPC1_14536 | PP-loop superfamily protein                                    | 84                  | 155                | 8                   | 44                     | +                    | +                  |                                  | B                  |                        |
| TPC1_15699 | Prolyl-tRNA synthetase                                         | 238                 | 193                | 5                   | 73                     | +                    | + <sup>l</sup>     | <i>Trichomonas</i>               | B                  |                        |
| TPC1_10098 | Pseudouridine-5'-phosphate glycosidase                         | 4                   | 4                  | 8                   | 38                     | -                    | -                  |                                  | B                  |                        |
| TPC1_15967 | Putative cysteine synthase                                     | 244                 | 206                | 1                   | 385                    | -                    | -                  |                                  | B                  |                        |
| TPC1_12115 | Putative cytoplasmic protein                                   | 177                 | 72                 | 2                   | 34                     | -                    | -                  | <i>Oxytricha</i>                 | B                  |                        |
| TPC1_12962 | Putative glucoamylase                                          | 58                  | 111                | 7                   | 82                     | -                    | -                  |                                  | B                  |                        |
| TPC1_16446 | Putative NADPH-flavin oxidoreductase                           | 118                 | 225                | 6                   | 510                    | -                    | -                  |                                  | A                  |                        |
| TPC1_10236 | Putative reverse transcriptase/endonuclease                    | 140                 | 261                | 30                  | 110                    | +                    | +                  |                                  | B                  |                        |
| TPC1_10521 | Putative reverse transcriptase/endonuclease                    | 140                 | 261                | 31                  | 304                    | +                    | +                  |                                  | B                  |                        |
| TPC1_14372 | Putative reverse transcriptase/endonuclease                    | 140                 | 261                | 8                   | 84                     | +                    | +                  |                                  | B                  |                        |
| TPC1_15139 | Putative reverse transcriptase/endonuclease                    | 140                 | 261                | 15                  | 54                     | +                    | +                  |                                  | B                  |                        |
| TPC1_17609 | Putative reverse transcriptase/endonuclease                    | 140                 | 261                | 20                  | 19                     | +                    | +                  |                                  | B                  |                        |
| TPC1_12201 | Putative selenium-dependent hydroxylase accessory protein YqeC | 179                 | 78                 | 6                   | 11                     | -                    | -                  |                                  | B                  |                        |
| TPC1_11094 | Pyrazinamidase/nicotinamidase                                  | 20                  | 40                 | 5                   | 158                    | +                    | +                  |                                  | B                  |                        |
| TPC1_15634 | Pyridoxal-5'-phosphate-dependent protein beta subunit          | 237                 | 191                | 6                   | 2302                   | -                    | + <sup>l</sup>     | <i>Trichomonas</i>               | B                  |                        |
| TPC1_10745 | Pyridoxal-phosphate dependent enzyme family protein            | 154                 | 26                 | 6                   | 629                    | -                    | -                  | <i>Trichomonas</i>               | B                  |                        |
| TPC1_12251 | Pyrrolidone-carboxylate peptidase                              | 201                 | 122                | 4                   | 8                      | -                    | -                  |                                  | B                  |                        |
| TPC1_13217 | Pyrrolidone-carboxylate peptidase                              | 201                 | 122                | 4                   | 2                      | -                    | -                  |                                  | B                  |                        |
| TPC1_11036 | Pyruvate kinase                                                | 162                 | 37                 | 8                   | 13                     | +                    | +                  |                                  | B                  |                        |
| TPC1_13574 | Pyruvate-formate lyase-activating enzyme                       | 206                 | 132                | 3                   | 15                     | +                    | -                  | <i>Blastocystis</i>              | B                  |                        |
| TPC1_15796 | Pyruvate-formate lyase-activating enzyme                       | 206                 | 199                | 10                  | 77                     | +                    | -                  | <i>Trichomonas, Blastocystis</i> | B                  |                        |

| Transcript | annotation                                                                 | event# <sup>a</sup> | tree# <sup>b</sup> | #stops <sup>c</sup> | abundance <sup>d</sup> | Giardia <sup>e</sup> | Spiro <sup>f</sup> | other euks <sup>g</sup>                                       | donor <sup>h</sup> | bootstrap <sup>h</sup> |
|------------|----------------------------------------------------------------------------|---------------------|--------------------|---------------------|------------------------|----------------------|--------------------|---------------------------------------------------------------|--------------------|------------------------|
| TPC1_12313 | Radical SAM domain protein                                                 | 180                 | 81                 | 6                   | 4                      | -                    | -                  |                                                               | B                  |                        |
| TPC1_15581 | Radical SAM domain protein                                                 | 235                 | 189                | 12                  | 4                      | -                    | -                  | <i>Dictyostelium,</i><br><i>Rhizophagus</i>                   | B                  |                        |
| TPC1_15680 | Redoxin domain protein                                                     | 98                  | 192                | 3                   | 121                    | +                    | +                  |                                                               | B                  |                        |
| TPC1_16239 | Ribonuclease H                                                             | 248                 | 217                | 6                   | 6                      | +                    | +                  | <i>Beauveria,</i><br><i>Cordyceps,</i><br><i>Trichosporon</i> | B                  |                        |
| TPC1_17210 | Ribonuclease Z                                                             | 261                 | 250                | 3                   | 2                      | -                    | -                  |                                                               | B                  |                        |
| TPC1_17305 | Ribose-phosphate pyrophosphokinase                                         | 262                 | 254                | 4                   | 184                    | +                    | +                  |                                                               | B                  |                        |
| TPC1_12540 | Ribosomal subunit interface protein,<br>putative                           | 46                  | 87                 | 2                   | 5                      | -                    | -                  |                                                               | B-Proteobacteria   | 98                     |
| TPC1_12777 | Ricin superfamily protein                                                  | 53                  | 104                | 10                  | 259                    | -                    | -                  |                                                               | B                  |                        |
| TPC1_12838 | Ricin superfamily protein                                                  | 53                  | 104                | 8                   | 273                    | -                    | -                  |                                                               | B                  |                        |
| TPC1_12870 | Ricin superfamily protein                                                  | 53                  | 104                | 3                   | 1267                   | -                    | -                  |                                                               | B                  |                        |
| TPC1_12916 | Ricin superfamily protein                                                  | 53                  | 104                | 9                   | 351                    | -                    | -                  |                                                               | B                  |                        |
| TPC1_11463 | RT/endonuclease (Fragment)                                                 | 140                 | 261                | 25                  | 4074                   | +                    | +                  |                                                               | B                  |                        |
| TPC1_14434 | RtcB protein                                                               | 129                 | 246                | 15                  | 18                     | +                    | -                  |                                                               | B                  |                        |
| TPC1_16537 | RtcB protein                                                               | 129                 | 246                | 8                   | 36                     | +                    | -                  |                                                               | B                  |                        |
| TPC1_17111 | RtcB protein                                                               | 129                 | 246                | 8                   | 8                      | +                    | -                  |                                                               | B                  |                        |
| TPC1_13878 | RtcB protein                                                               | 269                 | 246                | 6                   | 6                      | +                    | -                  |                                                               | B                  |                        |
| TPC1_16224 | Rubredoxin                                                                 | 112                 | 215                | 2                   | 2                      | -                    | -                  |                                                               | B                  |                        |
| TPC1_15994 | Rubrerythrin 1                                                             | 245                 | 207                | 3                   | 2747                   | -                    | +                  |                                                               | B                  |                        |
| TPC1_16884 | Selenide, water dikinase                                                   | 127                 | 241                | 16                  | 278                    | -                    | +                  |                                                               | B                  |                        |
| TPC1_12988 | Serine acetyltransferase                                                   | 60                  | 113                | 2                   | 181                    | -                    | +                  |                                                               | B                  |                        |
| TPC1_15718 | Serine acetyltransferase                                                   | 60                  | 113                | 4                   | 57                     | -                    | +                  |                                                               | B                  |                        |
| TPC1_15766 | SPFH domain/Band 7 family protein                                          | 240                 | 197                | 4                   | 919                    | -                    | -                  | <i>Ichthyophthirius,</i><br><i>Tetrahymena</i>                | B                  |                        |
| TPC1_14612 | Streptococcal 67 kDa myosin-cross-<br>reactive antigen like family protein | 215                 | 160                | 1                   | 183                    | -                    | -                  | <i>Trichomonas</i>                                            | B                  |                        |
| TPC1_15304 | Streptococcal 67 kDa myosin-cross-<br>reactive antigen like family protein | 229                 | 180                | 2                   | 897                    | -                    | -                  | <i>Trichomonas</i>                                            | B                  |                        |
| TPC1_13903 | Structural maintenance of chromosomes<br>protein                           | 74                  | 138                | 46                  | 32                     | - <sup>m</sup>       | - <sup>j</sup>     |                                                               | B-Firmicutes       | 72                     |
| TPC1_15922 | Succinyl-CoA ligase like flavodoxin domain-<br>containing protein          | 243                 | 204                | 3                   | 52                     | -                    | +                  |                                                               | B                  |                        |

| Transcript | annotation                                        | event# <sup>a</sup> | tree# <sup>b</sup> | #stops <sup>c</sup> | abundance <sup>d</sup> | Giardia <sup>e</sup> | Spiro <sup>f</sup> | other euks <sup>g</sup> | donor <sup>h</sup> | bootstrap <sup>h</sup> |
|------------|---------------------------------------------------|---------------------|--------------------|---------------------|------------------------|----------------------|--------------------|-------------------------|--------------------|------------------------|
| TPC1_13859 | Sugar kinase                                      | 73                  | 137                | 14                  | 73                     | -                    | -                  |                         | B                  |                        |
| TPC1_11794 | Sugar phosphate isomerase                         | 34                  | 60                 | 12                  | 287                    | -                    | -                  |                         | B-Firmicutes       | 74                     |
| TPC1_10839 | Sulfide dehydrogenase                             | 17                  | 32                 | 14                  | 675                    | +                    | +                  |                         | B                  |                        |
| TPC1_12608 | Superoxide reductase                              | 48                  | 93                 | 0                   | 5017                   | + <sup>k</sup>       | + <sup>l</sup>     |                         | A                  |                        |
| TPC1_15995 | Tetratricopeptide repeat protein                  | 246                 | 208                | 43                  | 21                     | +                    | +                  |                         | B                  |                        |
| TPC1_12556 | Thermophilic metalloprotease (M29) family protein | 185                 | 88                 | 12                  | 142                    | -                    | +                  |                         | B                  |                        |
| TPC1_16260 | Thermophilic metalloprotease (M29) family protein | 185                 | 88                 | 12                  | 27                     | -                    | +                  |                         | B                  |                        |
| TPC1_13737 | Thioredoxin domain-containing protein             | 117                 | 224                | 4                   | 38                     | +                    | +                  |                         | B                  |                        |
| TPC1_16442 | Thioredoxin domain-containing protein             | 117                 | 224                | 1                   | 6948                   | +                    | +                  |                         | B                  |                        |
| TPC1_11291 | Thiosulfate sulfurtransferase                     | 165                 | 47                 | 13                  | 80                     | +                    | +                  |                         | B                  |                        |
| TPC1_15867 | Threonine synthase                                | 242                 | 201                | 5                   | 64                     | - <sup>m</sup>       | - <sup>j</sup>     | <i>Trichomonas</i>      | B                  |                        |
| TPC1_17300 | Transcription activator effector binding          | 134                 | 252                | 1                   | 233                    | -                    | -                  |                         | B                  |                        |
| TPC1_10808 | Transglutaminase domain protein                   | 16                  | 31                 | 6                   | 4                      | -                    | -                  |                         | B-Verrucomicrobia  | 100                    |
| TPC1_17366 | Transglutaminase domain protein                   | 16                  | 31                 | 10                  | 8                      | -                    | -                  |                         | B-Verrucomicrobia  | 100                    |
| TPC1_11449 | Transglutaminase-like superfamily protein         | 27                  | 50                 | 10                  | 5                      | +                    | +                  |                         | B                  |                        |
| TPC1_11584 | Transglutaminase-like superfamily protein         | 27                  | 50                 | 3                   | 7                      | +                    | +                  |                         | B                  |                        |
| TPC1_11691 | Transglutaminase-like superfamily protein         | 27                  | 50                 | 10                  | 134                    | +                    | +                  |                         | B                  |                        |
| TPC1_15656 | Transglutaminase-like superfamily protein         | 27                  | 50                 | 9                   | 163                    | +                    | +                  |                         | B                  |                        |
| TPC1_16279 | Transglutaminase-like superfamily protein         | 27                  | 50                 | 13                  | 24                     | +                    | +                  |                         | B                  |                        |
| TPC1_17799 | Transglutaminase-like superfamily protein         | 27                  | 50                 | 6                   | 31                     | +                    | +                  |                         | B                  |                        |
| TPC1_10101 | Transglutaminase-like superfamily protein         | 75                  | 139                | 13                  | 37                     | + <sup>k</sup>       | + <sup>l</sup>     |                         | B                  |                        |
| TPC1_11836 | Transglutaminase-like superfamily protein         | 75                  | 139                | 4                   | 25                     | + <sup>k</sup>       | + <sup>l</sup>     |                         | B                  |                        |
| TPC1_13112 | Transglutaminase-like superfamily protein         | 75                  | 139                | 5                   | 17                     | + <sup>k</sup>       | + <sup>l</sup>     |                         | B                  |                        |
| TPC1_13963 | Transglutaminase-like superfamily protein         | 75                  | 139                | 3                   | 11                     | + <sup>k</sup>       | + <sup>l</sup>     |                         | B                  |                        |
| TPC1_14925 | Transglutaminase-like superfamily protein         | 75                  | 139                | 18                  | 65                     | + <sup>k</sup>       | + <sup>l</sup>     |                         | B                  |                        |
| TPC1_17743 | Transglutaminase-like superfamily protein         | 75                  | 139                | 16                  | 36                     | + <sup>k</sup>       | + <sup>l</sup>     |                         | B                  |                        |
| TPC1_10215 | Transmembrane domain-containing protein           | 5                   | 7                  | 10                  | 3                      | -                    | -                  |                         | B                  |                        |
| TPC1_13082 | Transmembrane domain-containing protein           | 63                  | 119                | 7                   | 385                    | -                    | -                  |                         | B                  |                        |

| Transcript | annotation                                                           | event# <sup>a</sup> | tree# <sup>b</sup> | #stops <sup>c</sup> | abundance <sup>d</sup> | Giardia <sup>e</sup> | Spiro <sup>f</sup> | other euks <sup>g</sup>                    | donor <sup>h</sup> | bootstrap <sup>h</sup> |
|------------|----------------------------------------------------------------------|---------------------|--------------------|---------------------|------------------------|----------------------|--------------------|--------------------------------------------|--------------------|------------------------|
| TPC1_14676 | Transmembrane domain-containing protein                              | 89                  | 161                | 1                   | 113                    | -                    | -                  |                                            | B-Actinobacteria   | 77                     |
| TPC1_11482 | Transposase                                                          | 28                  | 51                 | 3                   | 3                      | -                    | -                  |                                            | B                  |                        |
| TPC1_15359 | tRNA (5-methylaminomethyl-2-thiouridylate)-methyltransferase         | 143                 | 267                | 5                   | 21                     | -                    | +                  |                                            | B-Fusobacteria     | 97                     |
| TPC1_17832 | tRNA (5-methylaminomethyl-2-thiouridylate)-methyltransferase         | 143                 | 267                | 16                  | 180                    | -                    | +                  |                                            | B-Fusobacteria     | 97                     |
| TPC1_11987 | UDP-glucose 4-epimerase                                              | 175                 | 67                 | 4                   | 74                     | +                    | +                  | <i>Albugo, Phytophthora, Thalassiosira</i> | B                  |                        |
| TPC1_14059 | UDP-glucose 4-epimerase                                              | 79                  | 143                | 7                   | 15                     | -                    | +                  |                                            | B                  |                        |
| TPC1_13309 | Uracil-DNA glycosylase                                               | 204                 | 125                | 5                   | 12                     | +                    | +                  | <i>Naegleria</i>                           | B                  |                        |
| TPC1_12817 | Uridine kinase                                                       | 256                 | 149                | 11                  | 9                      | +                    | +                  | <i>Entamoeba</i>                           | B                  |                        |
| TPC1_14335 | Uridine kinase                                                       | 256                 | 149                | 3                   | 51                     | +                    | +                  | <i>Entamoeba</i>                           | B                  |                        |
| TPC1_13475 | Uridine kinase                                                       | 256                 | 237                | 12                  | 440                    | +                    | +                  | <i>Entamoeba, Naegleria</i>                | B-Spirochaetes     | 91                     |
| TPC1_16769 | Uridine kinase                                                       | 256                 | 237                | 11                  | 230                    | +                    | +                  | <i>Entamoeba, Naegleria</i>                | B-Spirochaetes     | 91                     |
| TPC1_10095 | von Willebrand factor type A domain-containing protein               | 189                 | 95                 | 8                   | 120                    | -                    | -                  |                                            | B                  |                        |
| TPC1_12619 | von Willebrand factor type A domain-containing protein               | 189                 | 95                 | 1                   | 76                     | -                    | -                  |                                            | B                  |                        |
| TPC1_15206 | von Willebrand factor type A domain-containing protein               | 189                 | 95                 | 12                  | 426                    | -                    | -                  |                                            | B                  |                        |
| TPC1_17840 | von Willebrand factor type A domain-containing protein               | 189                 | 95                 | 9                   | 53                     | -                    | -                  |                                            | B                  |                        |
| TPC1_10764 | von Willebrand factor type A domain-containing protein               | 189                 | 219                | 3                   | 126                    | -                    | -                  |                                            | B                  |                        |
| TPC1_16258 | von Willebrand factor type A domain-containing protein               | 189                 | 219                | 2                   | 177                    | -                    | -                  |                                            | B                  |                        |
| TPC1_11208 | Xaa-Pro dipeptidase                                                  | 23                  | 43                 | 4                   | 117                    | + <sup>k</sup>       | +                  |                                            | B                  |                        |
| TPC1_12876 | Xanthine dehydrogenase accessory factor                              | 55                  | 106                | 11                  | 151                    | -                    | -                  |                                            | B                  |                        |
| TPC1_10271 | YqeB family selenium-dependent molybdenum hydroxylase system protein | 7                   | 11                 | 9                   | 96                     | -                    | -                  |                                            | B                  |                        |

<sup>a</sup>) Each number refer to a inferred gene transfer event.

<sup>b</sup>) Number refer to the reference tree in S1 File.

<sup>c</sup>) Number of in-frame TAA or TAG codons in the inferred *Trepomonas* open reading frame within the BLAST alignment against the best database match.



- d) Transcript expression as represented by Kmer abundance calculated by Inchworm.
- e) Presence of absence of a homolog with the same origin in *G. intestinalis*.
- f) Presence of absence of a homolog with the same origin in *S. salmonicida*.
- g) Indicate if sequences from non-diplomonad eukaryotes are branching with diplomonas in the tree.
- h) Inferred donor lineage. A indicates Archaea and B Bacteria.
- i) Bootstrap support value for the identification of specific donor group.
- j) *S. salmonicida* encodes a distantly related homolog
- k) *G. intestinalis* encodes a homolog not included in the tree
- l) *S. salmonicida* encodes a homolog not included in the tree
- m) *G. intestinalis* encodes a distantly related homolog
- n) Two transfers, one into *Giardia* and one into *Trepomonas*
